# Supplementary material for: Truncated mutants of beta-glucosidase 2 (GBA2) are localized in the mitochondrial matrix and cause mitochondrial fragmentation
Source: PubMed Central journal article supplement (PMC7269613; doi:10.1371/journal.pone.0233856), 2020-06-03
Supplement: pone.0233856.s005.pdf [file pone.0233856.s005.pdf]

**Fig 1 E (top panel)**

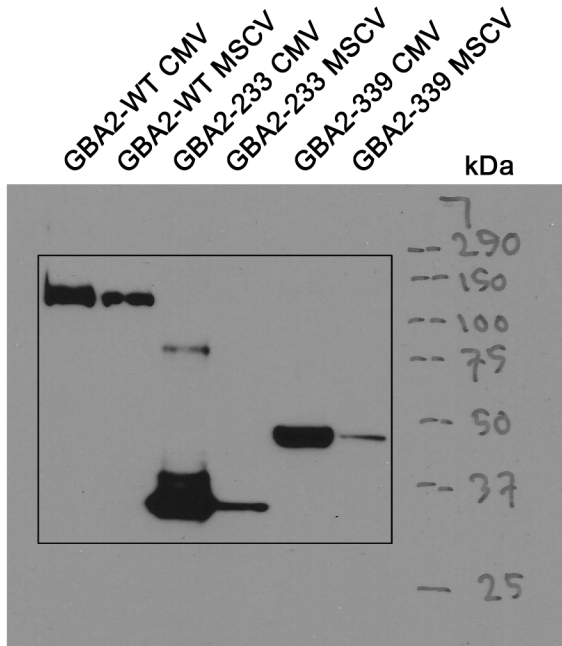

Anti-FLAG antibody; chemiluminescent substrate; X-ray film.

**Fig 1 E GAPDH loading control**

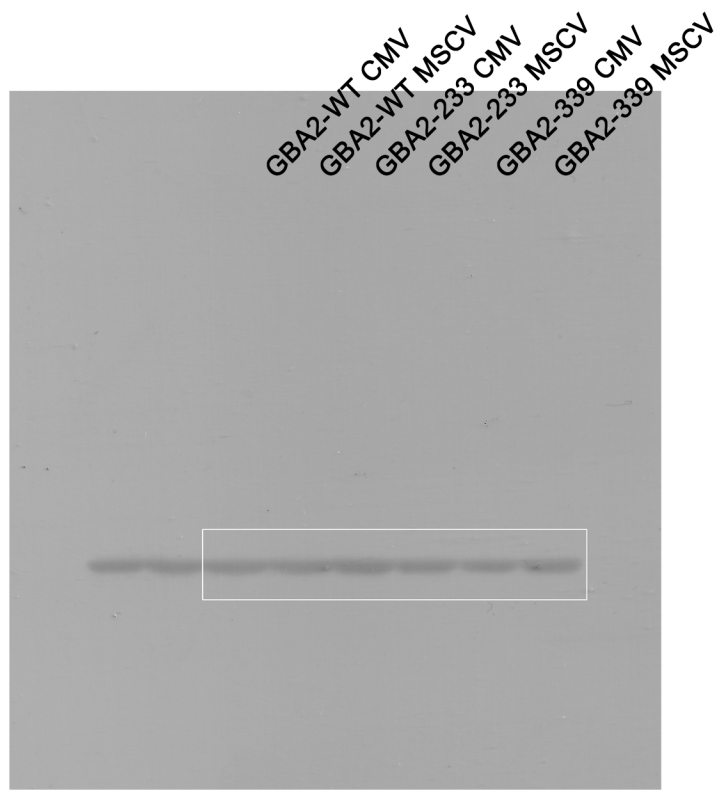

Anti-GAPDH antibody; chemiluminescent substrate; X-ray film.

**Fig 1 F**

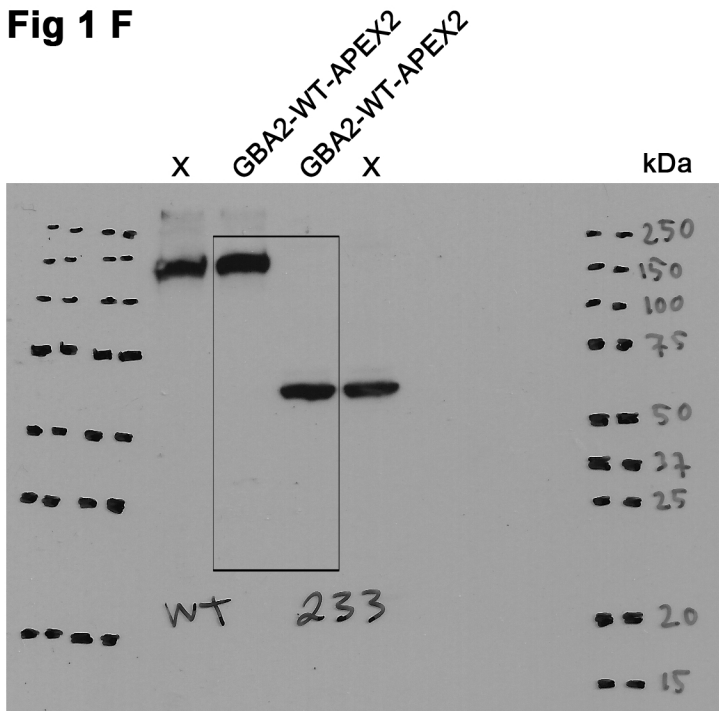

Anti-HA antibody; chemiluminescent substrate; X-ray film.

**Fig 6 B (upper panel)**

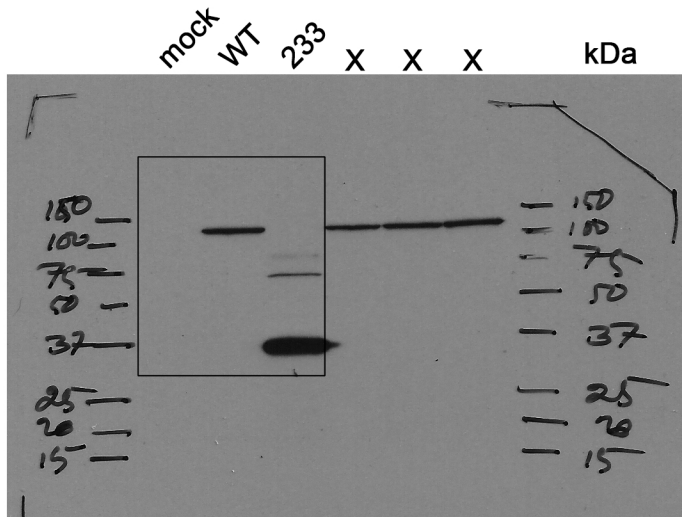

Anti-FLAG antibody; chemiluminescent substrate; X-ray film.

**Fig 6 B (loading control)**

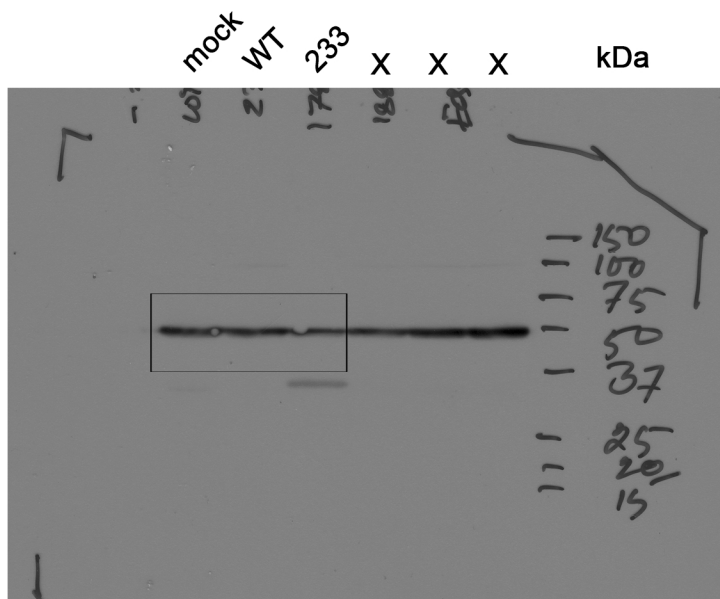

Anti-tubulin antibody; chemiluminescent substrate; X-ray film.

Fig 7B Upper left panel

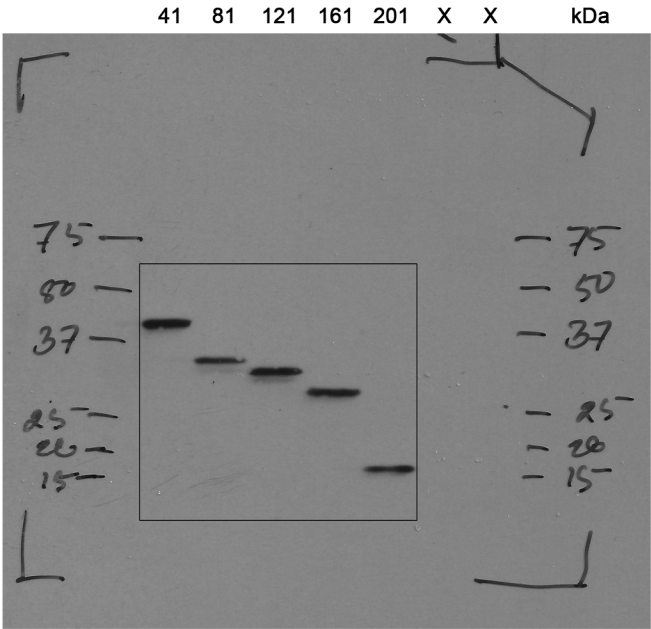

anti-FLAG; chemiluminescent substrate; X-ray film.

Fig 7B Lower left panel (loading control)

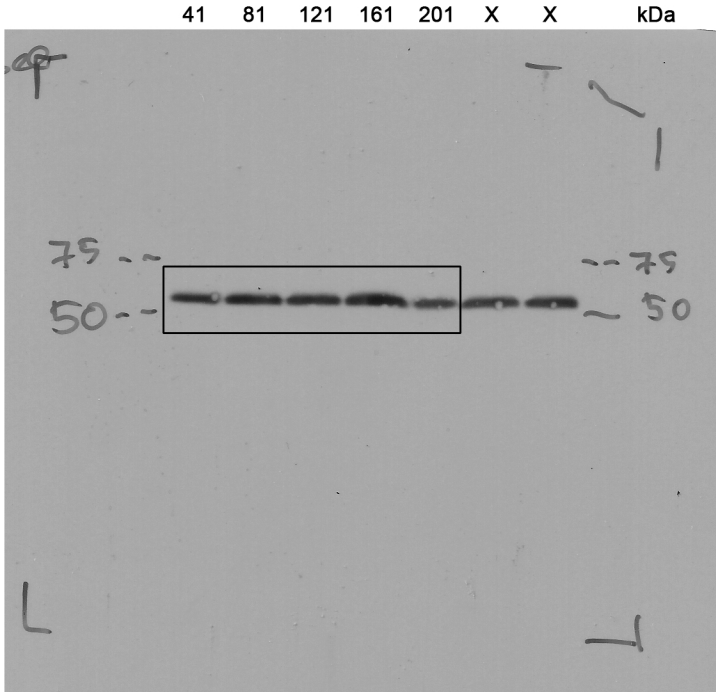

anti-tubulin; chemiluminescent substrate; X-ray film.

**Fig 7 B Upper right panel**

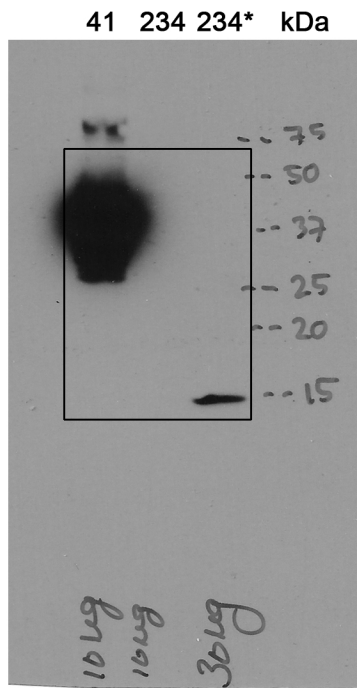

anti-FLAG; chemiluminescent substrate;  
X-ray film.

**Fig 7 B Lower right panel - Loading control**

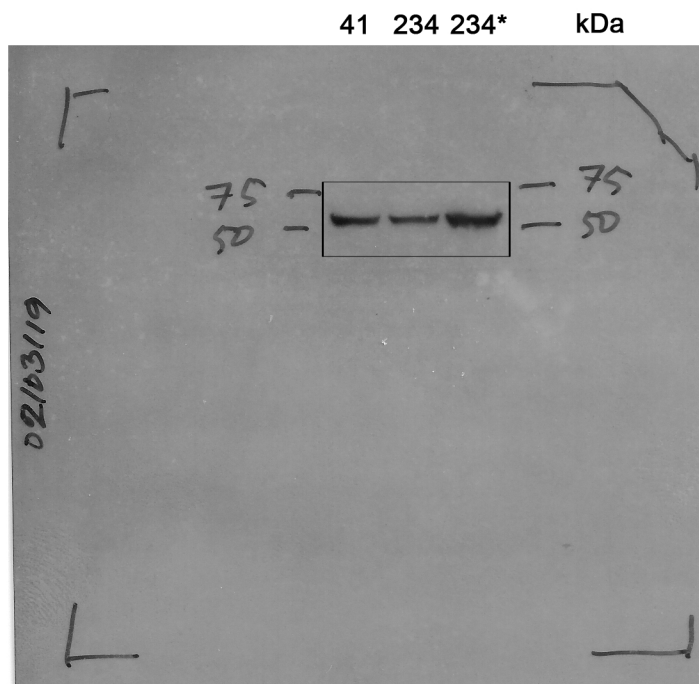

anti-tubulin; chemiluminescent substrate; X-ray film.
